# Supplementary material for: MARCH5 regulates mitotic apoptosis through MCL1-dependent and independent mechanisms
Source: PubMed Central journal article supplement (PMC9984497; doi:10.1038/s41418-022-01080-2), 2022-11-03

# Supplemental materials: original Western blots

Boxes indicate the lanes and bands used in the Figures and Supplemental Figures.  
All lanes and bands were used if no box is indicated.

## Fig 1A

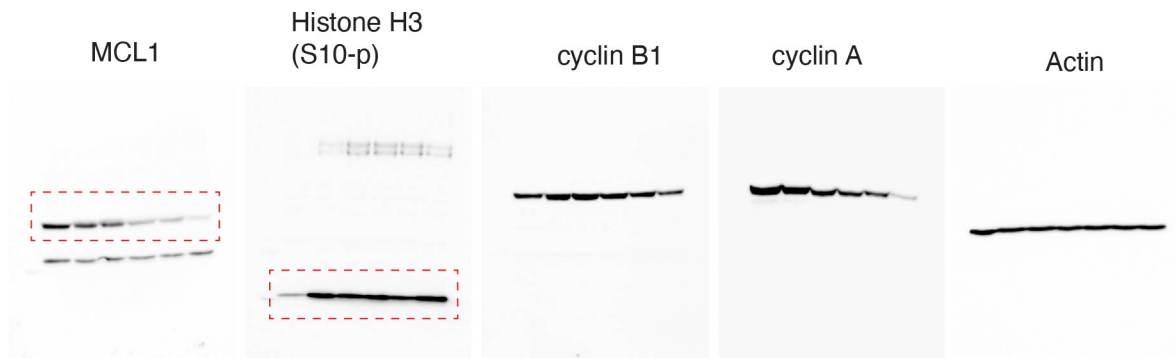

## Fig 1C

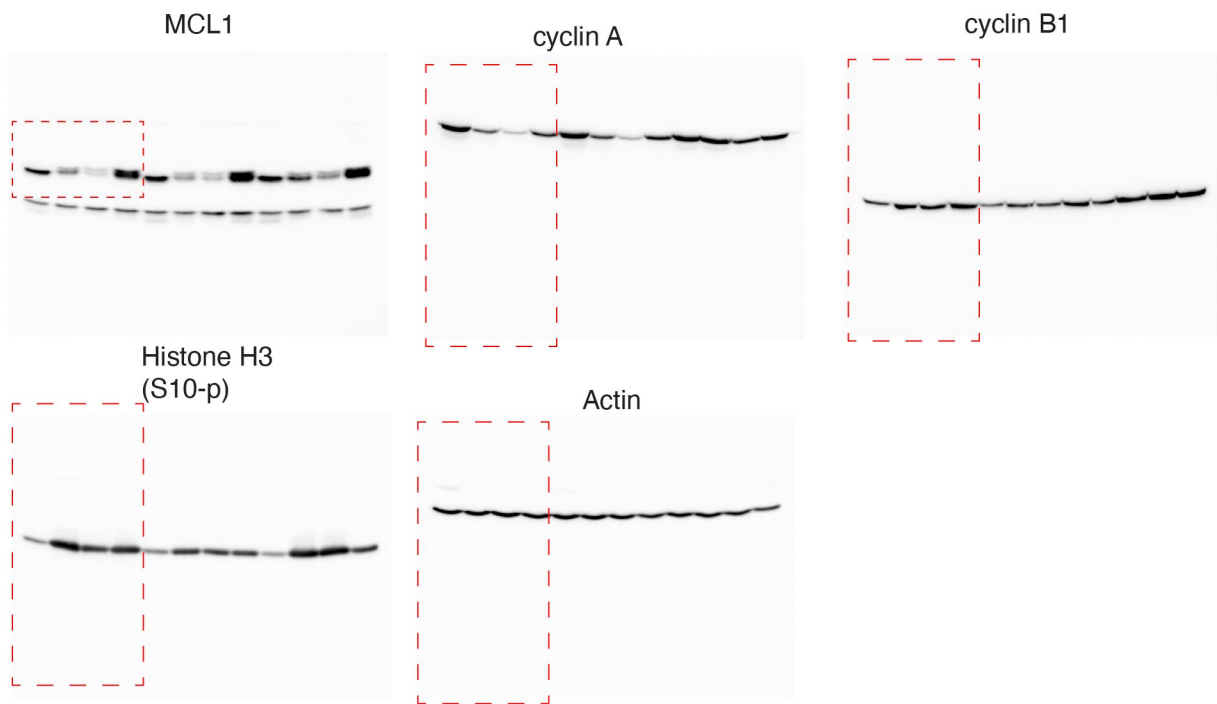

## Fig 1D

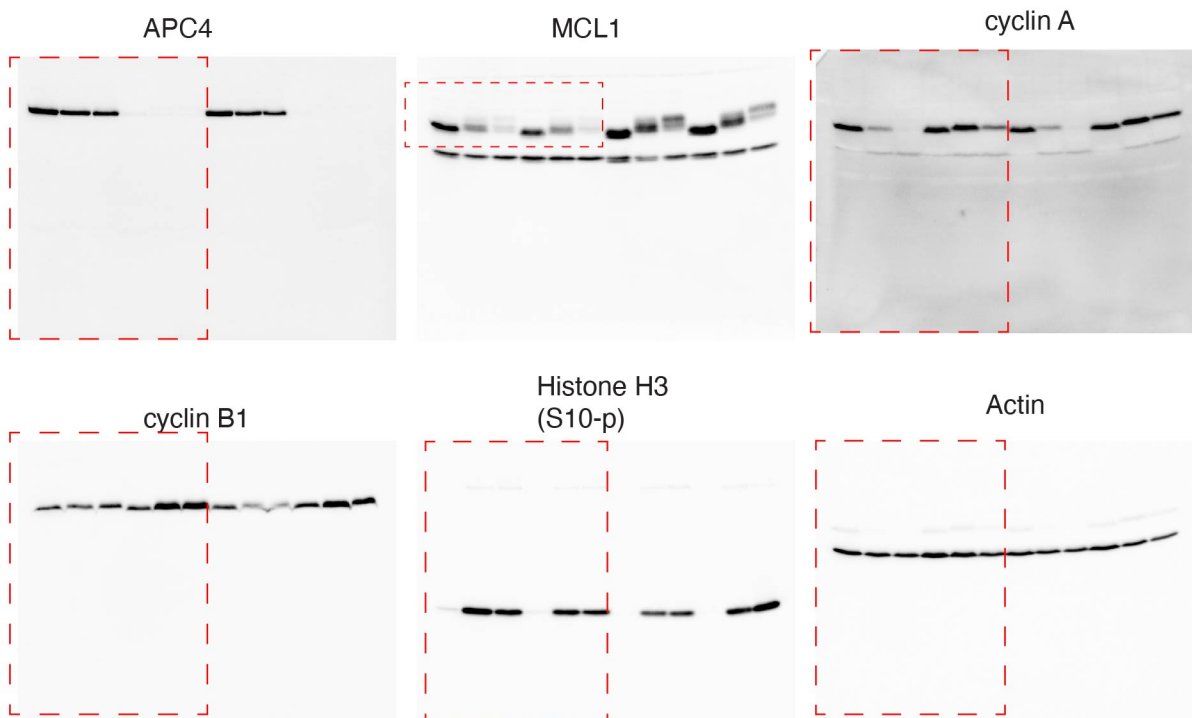

**Fig 2A**

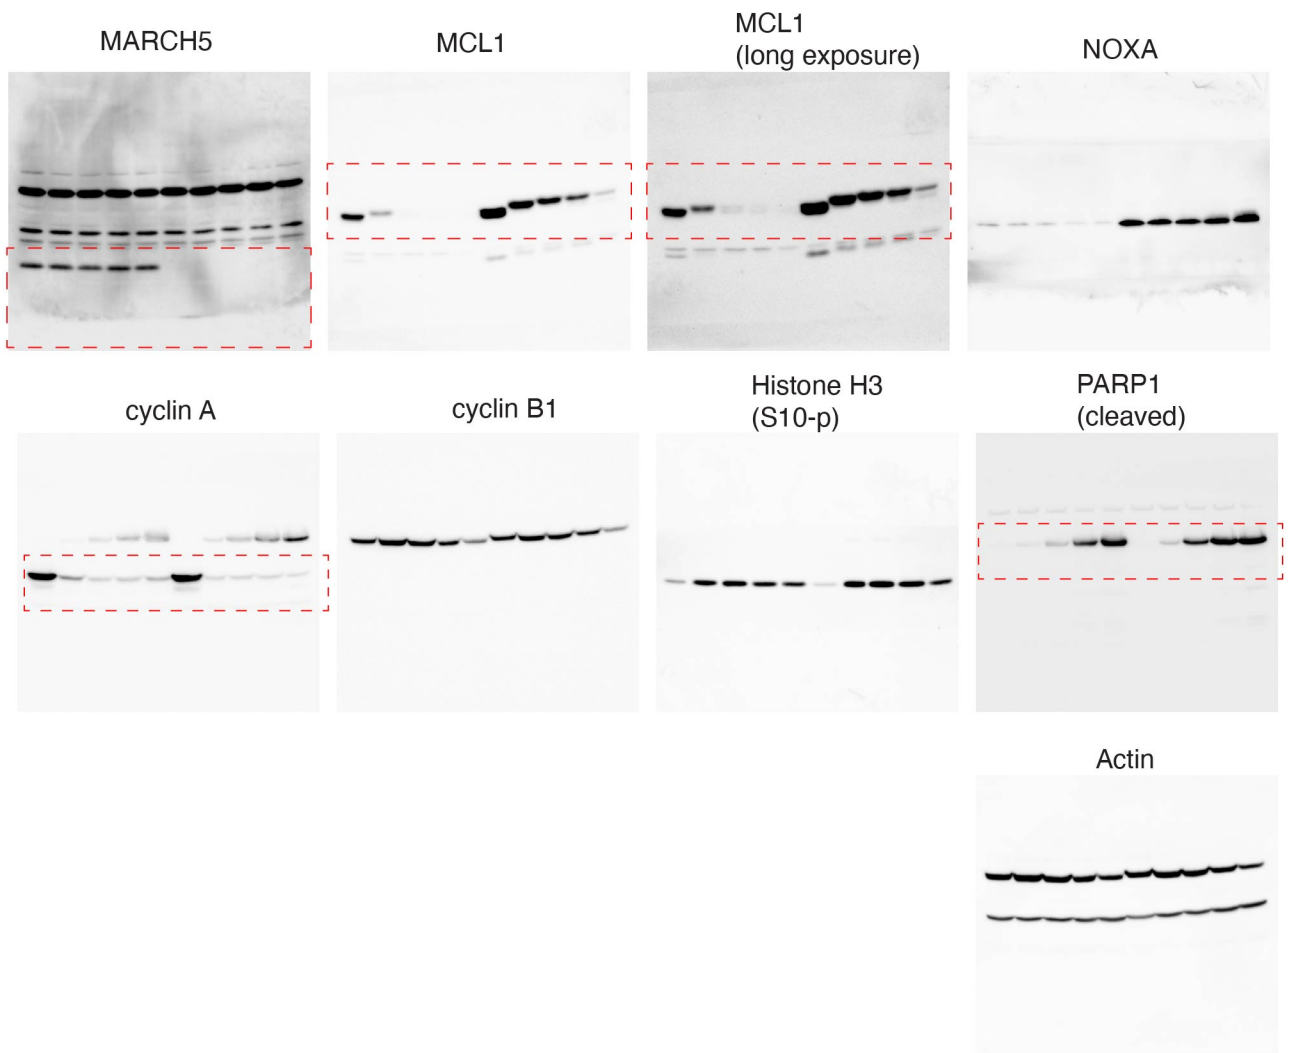

**Fig 2B**

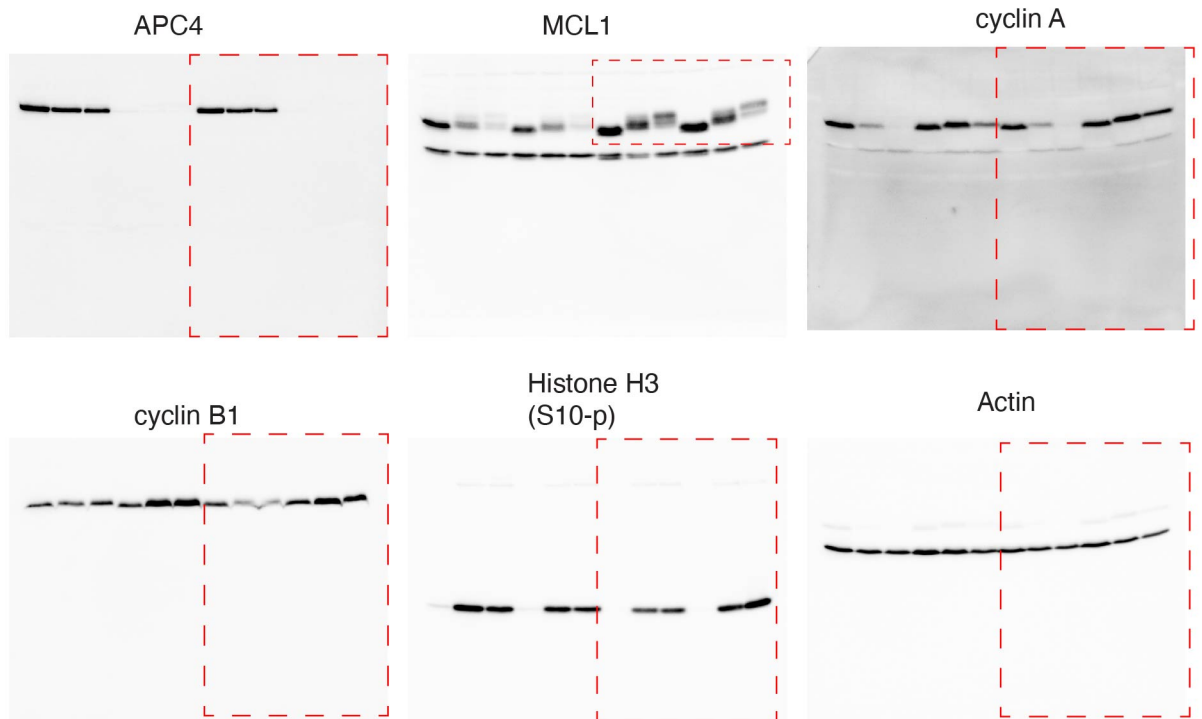

**Fig 2C**

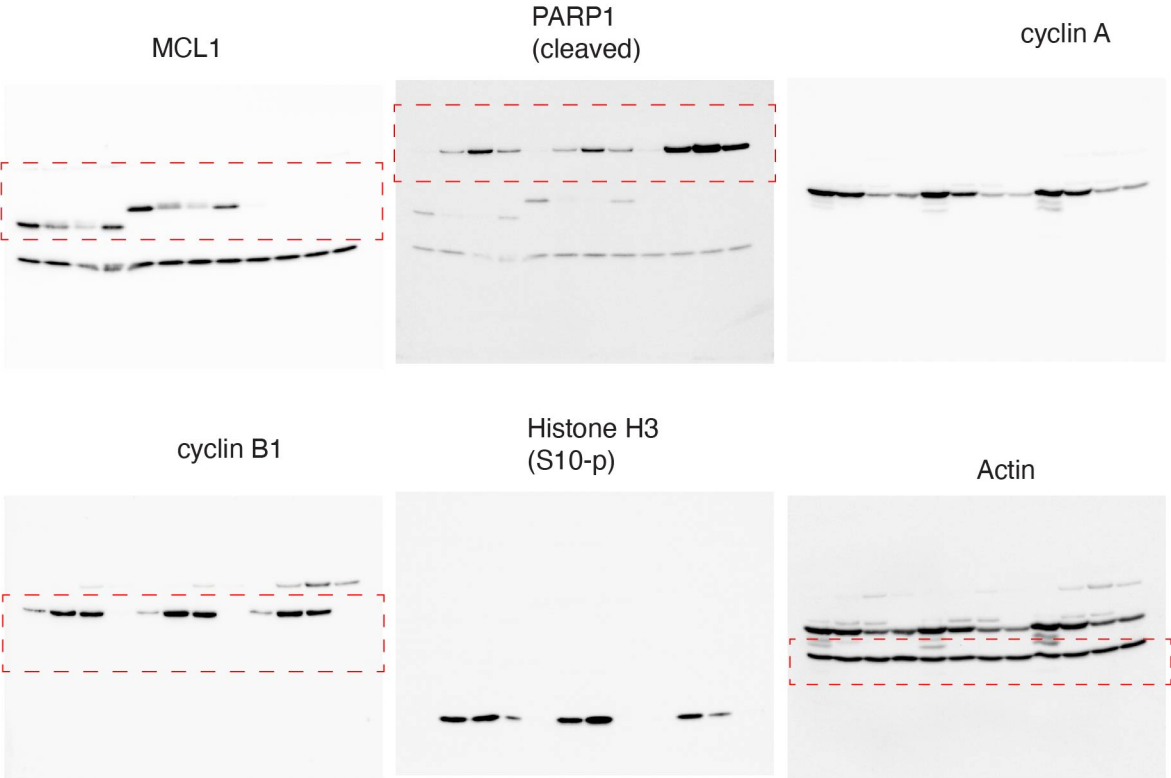

**Fig 3B**

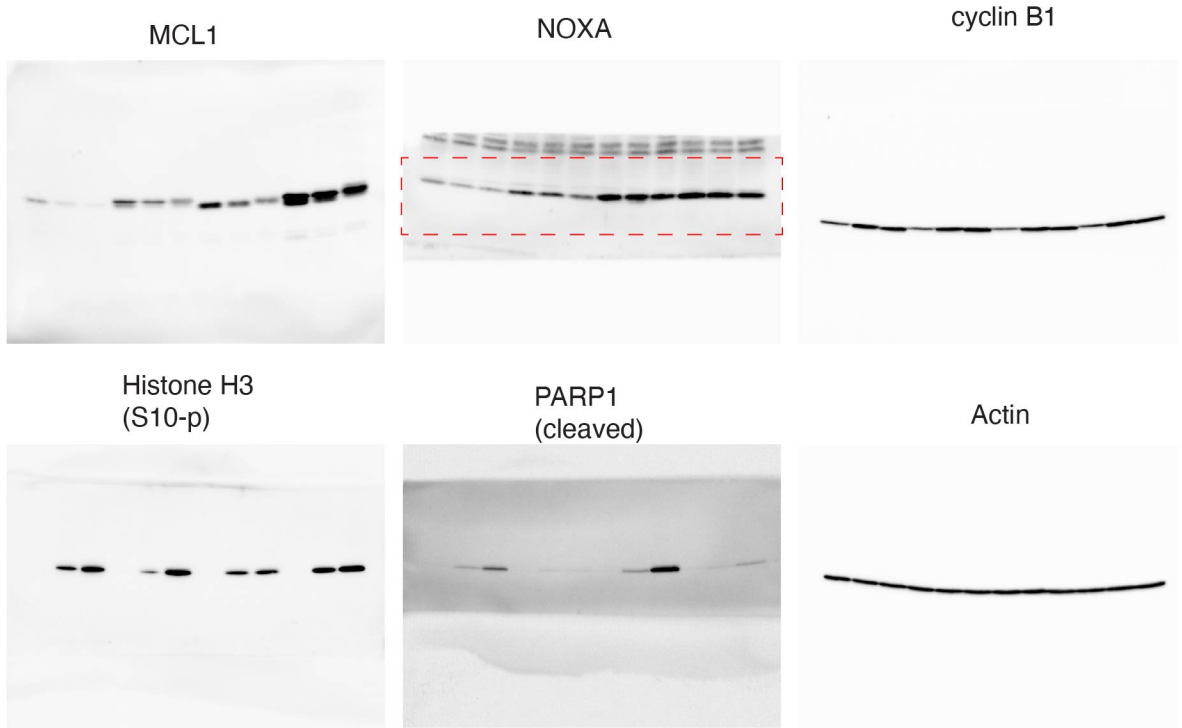

**Fig 3C**

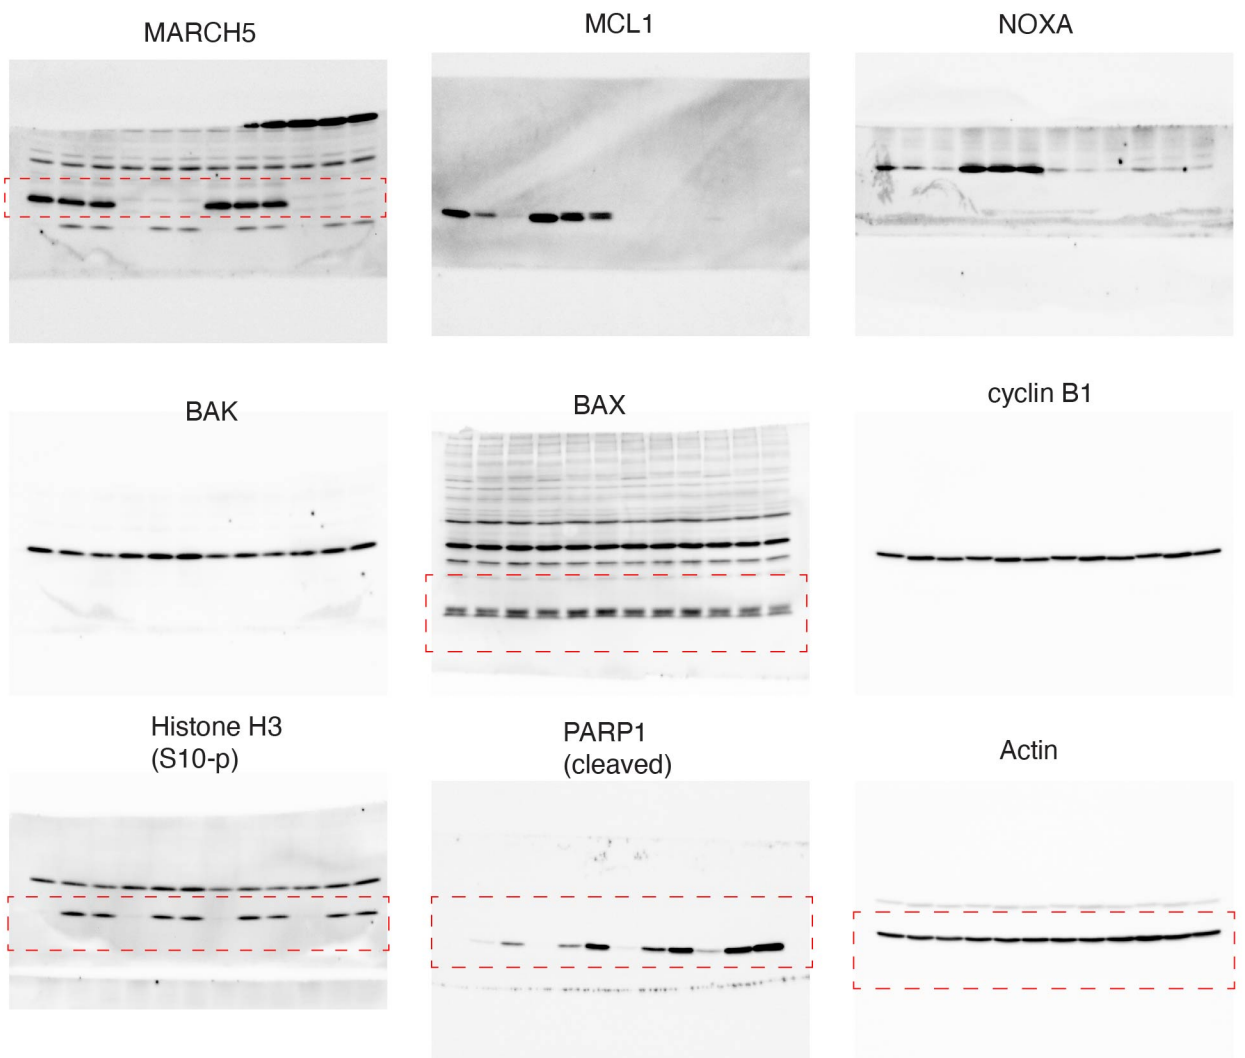

**Fig 4A**

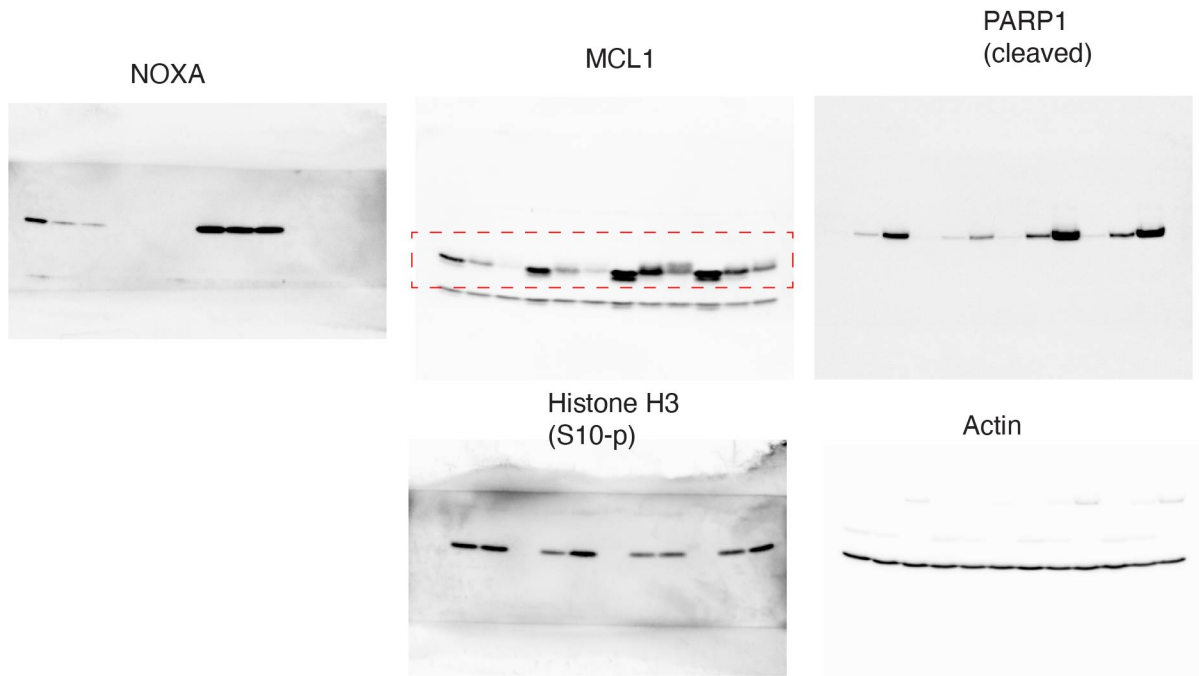

**Fig 4C**

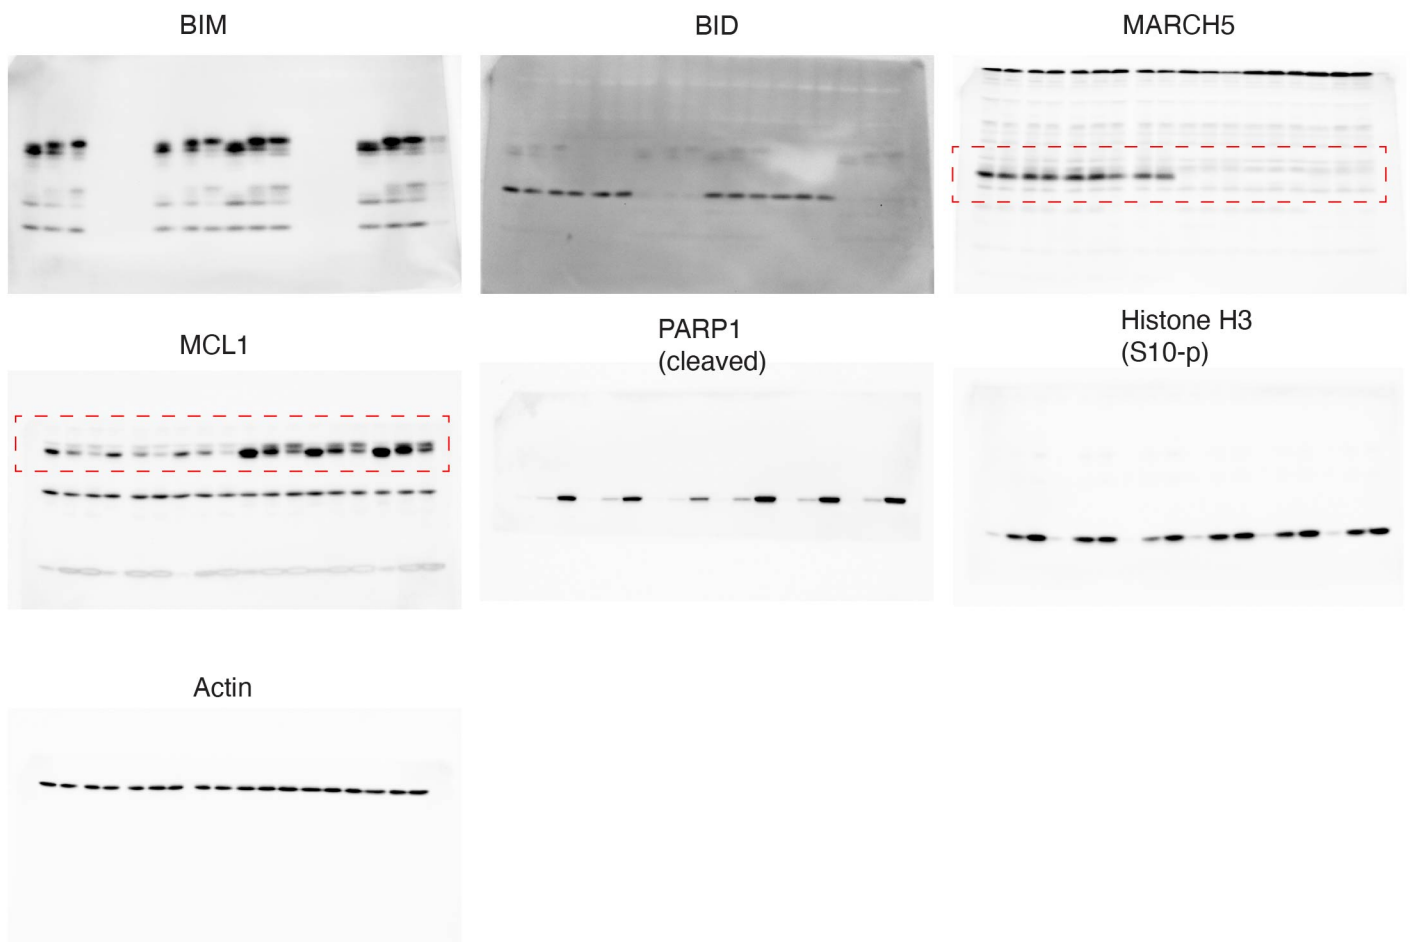

**Fig 5A**

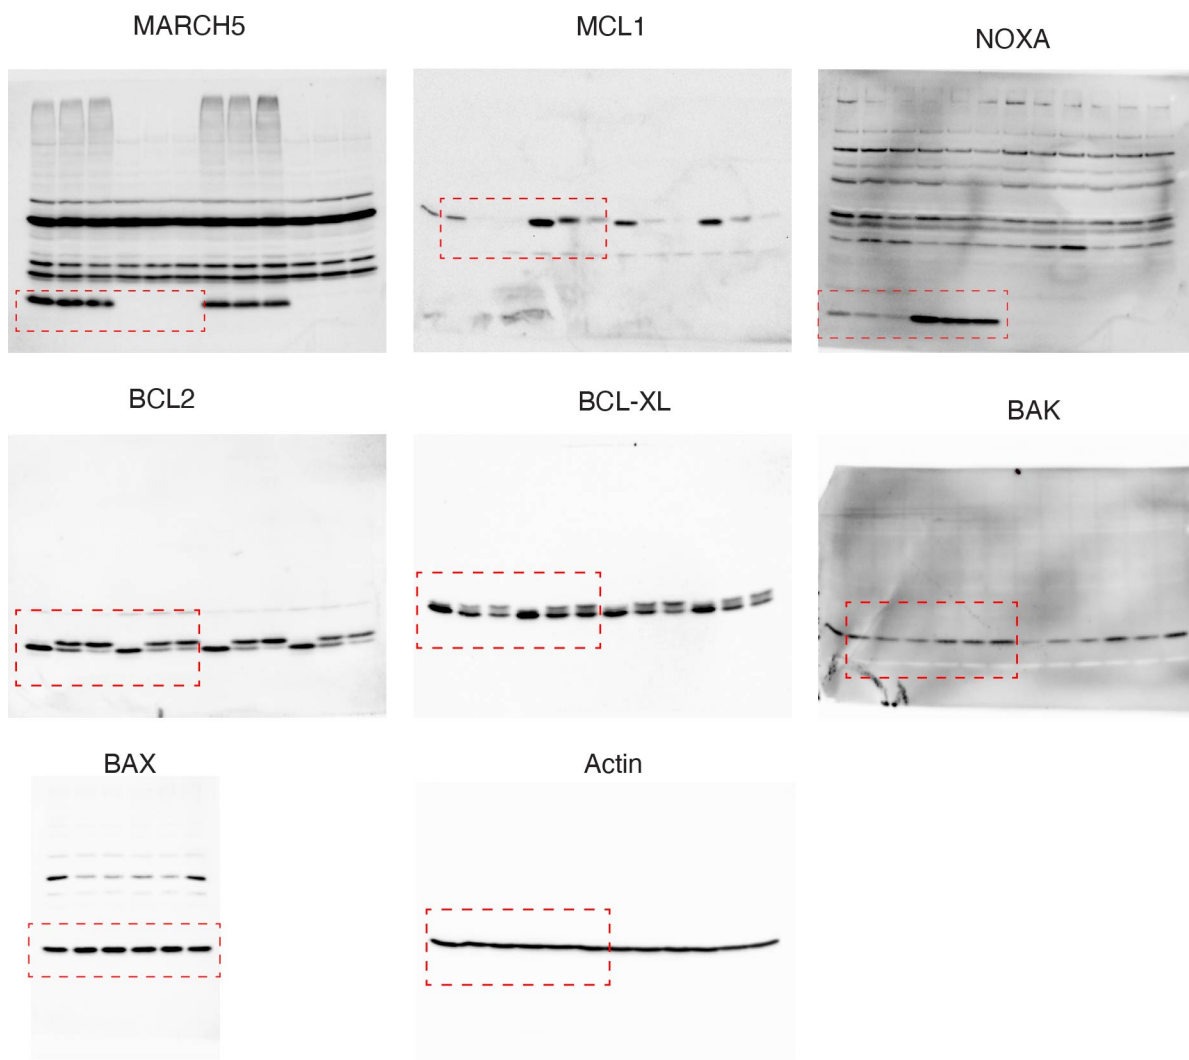

**Fig 5C**

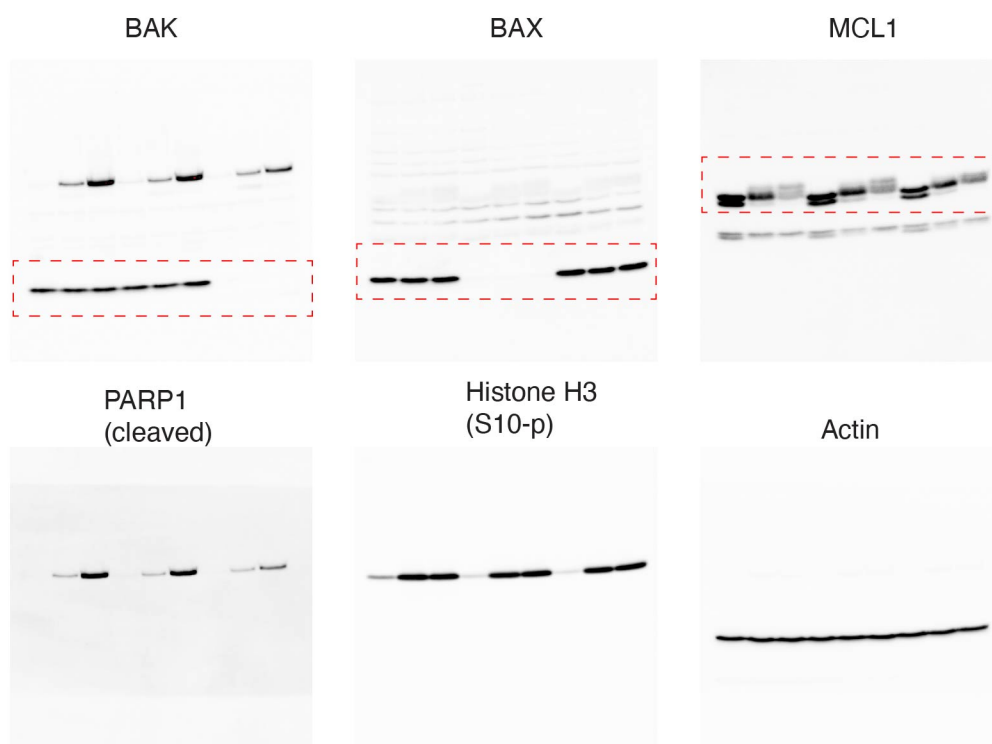

**Fig 6A**

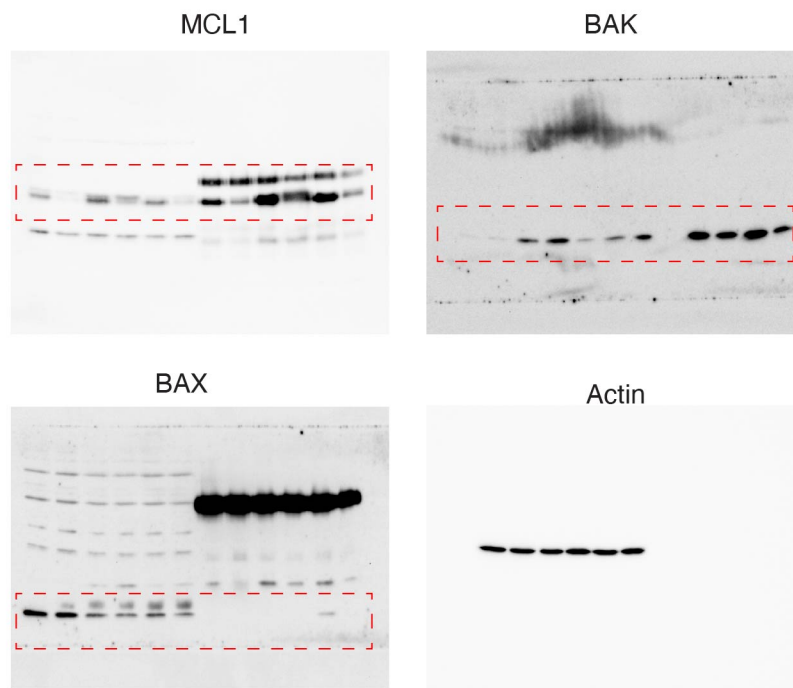

**Fig 6B**

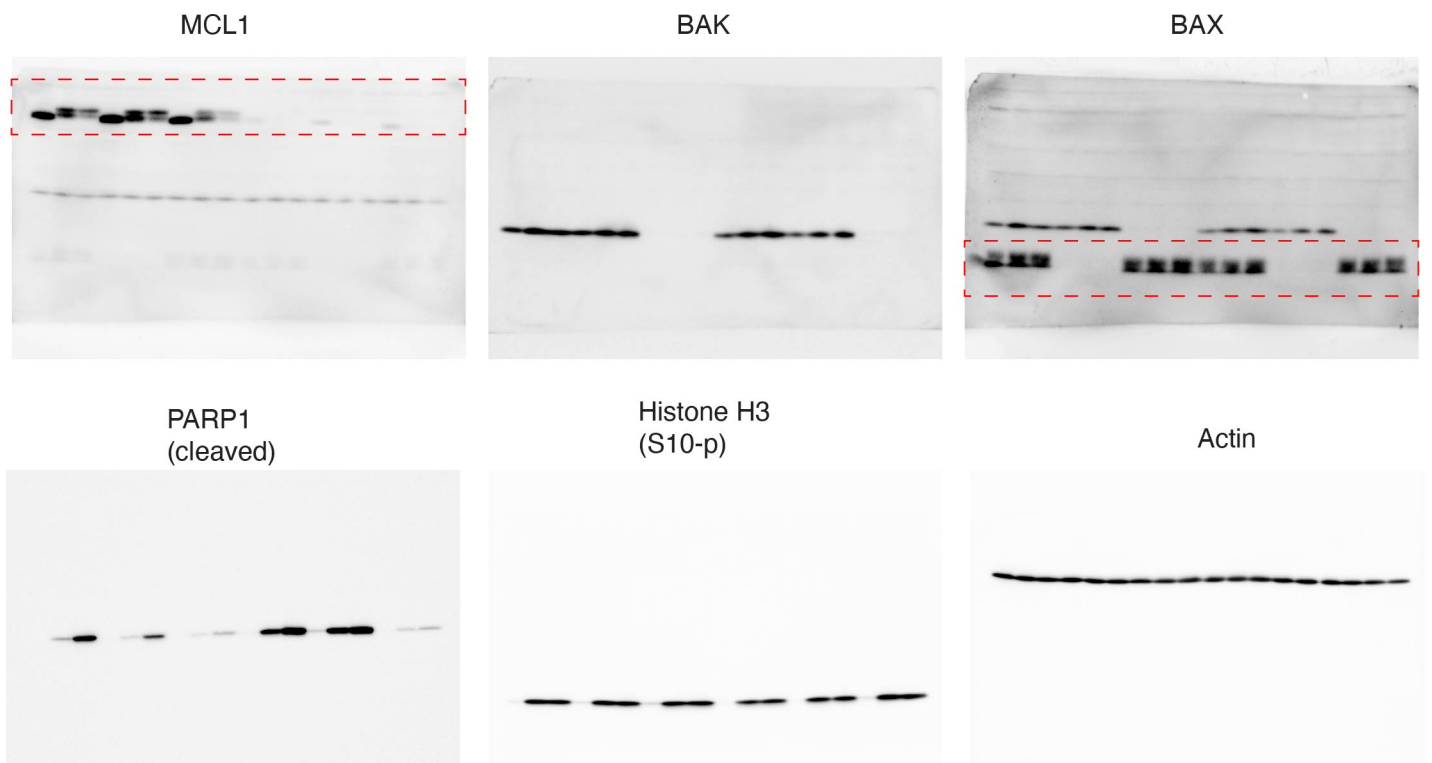



**Fig 7A**

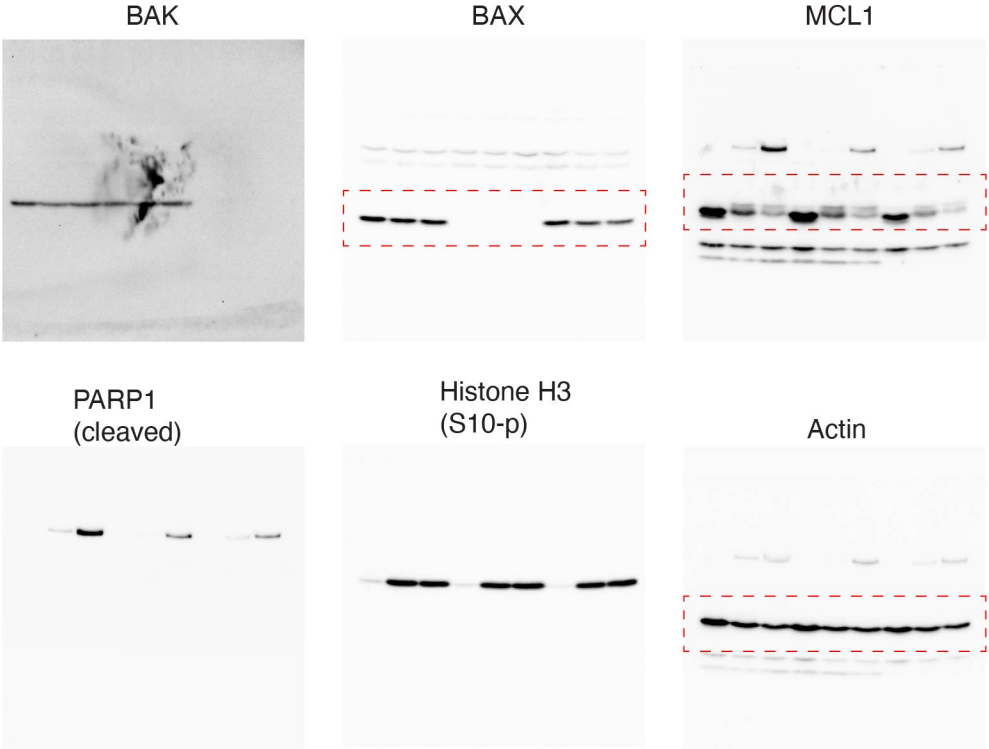

**Fig 7B**

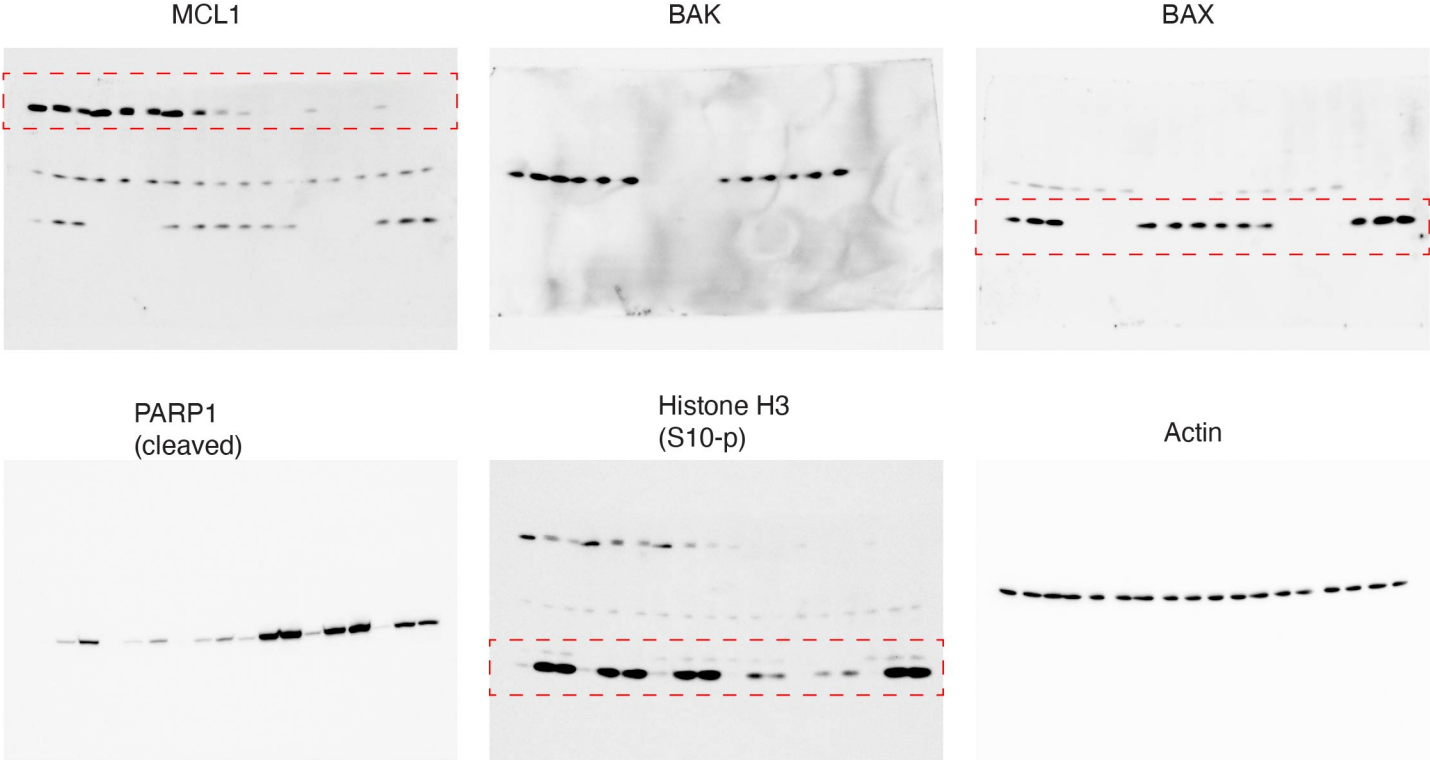



**Fig 8A**

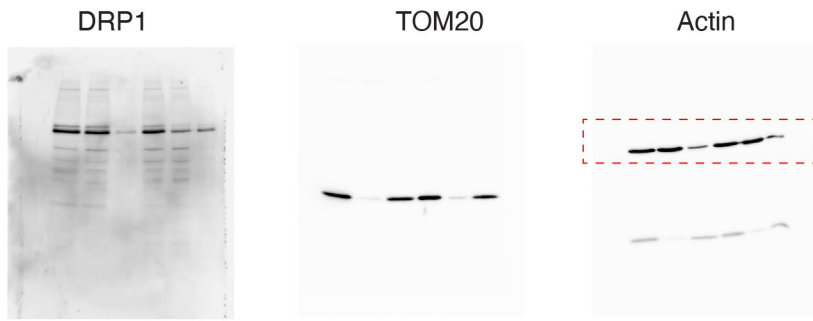

**Fig 8B**

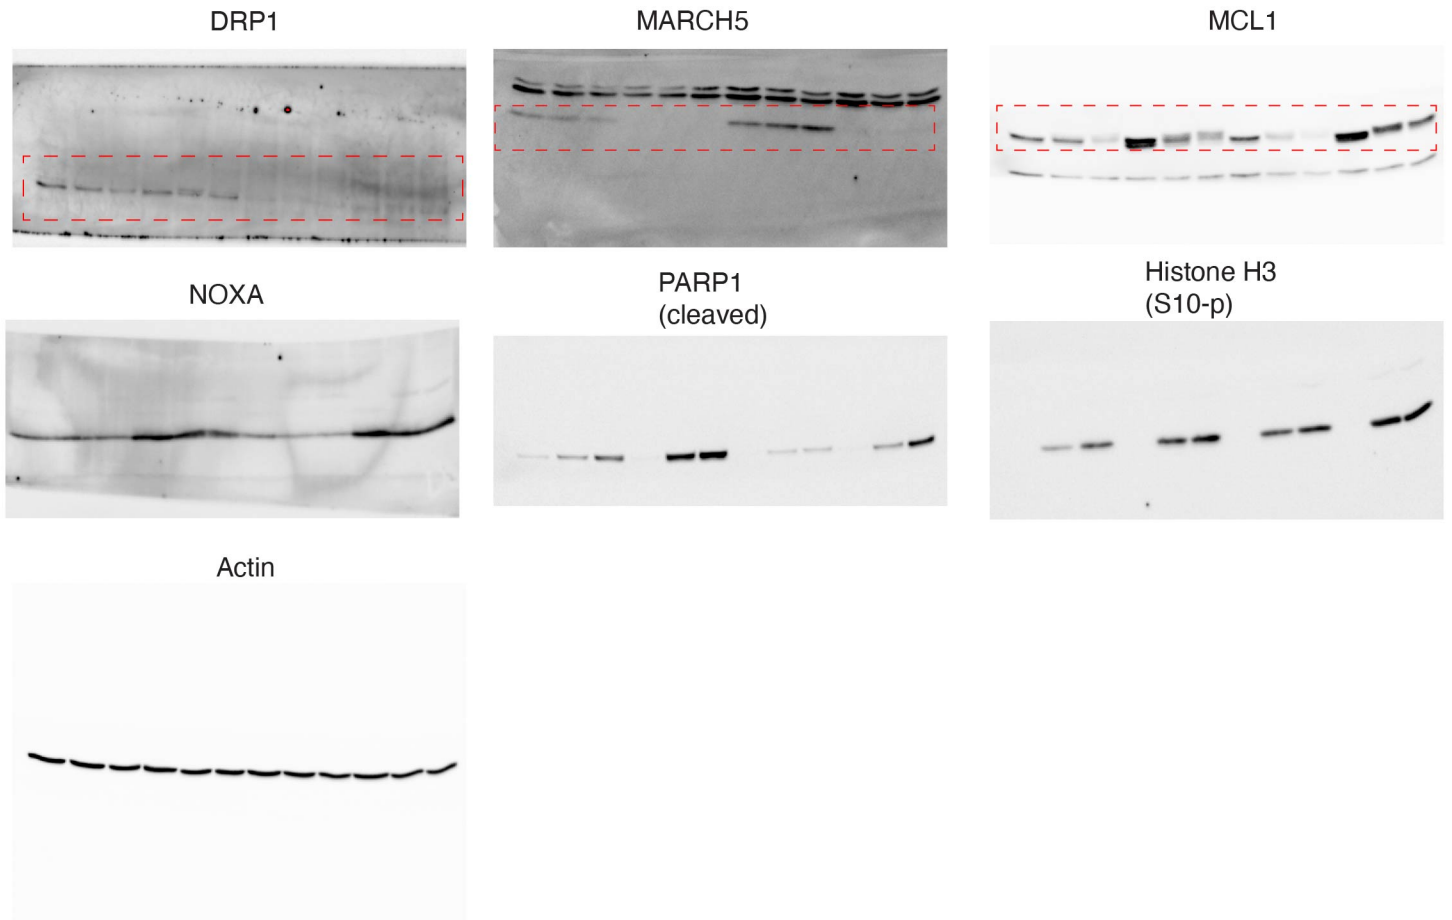

**Fig 8C**

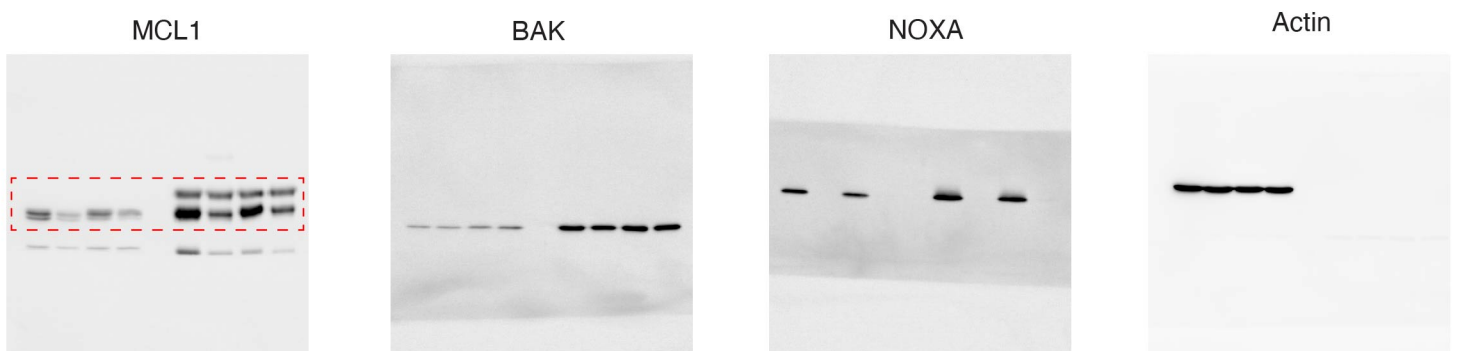

**Fig S1A**

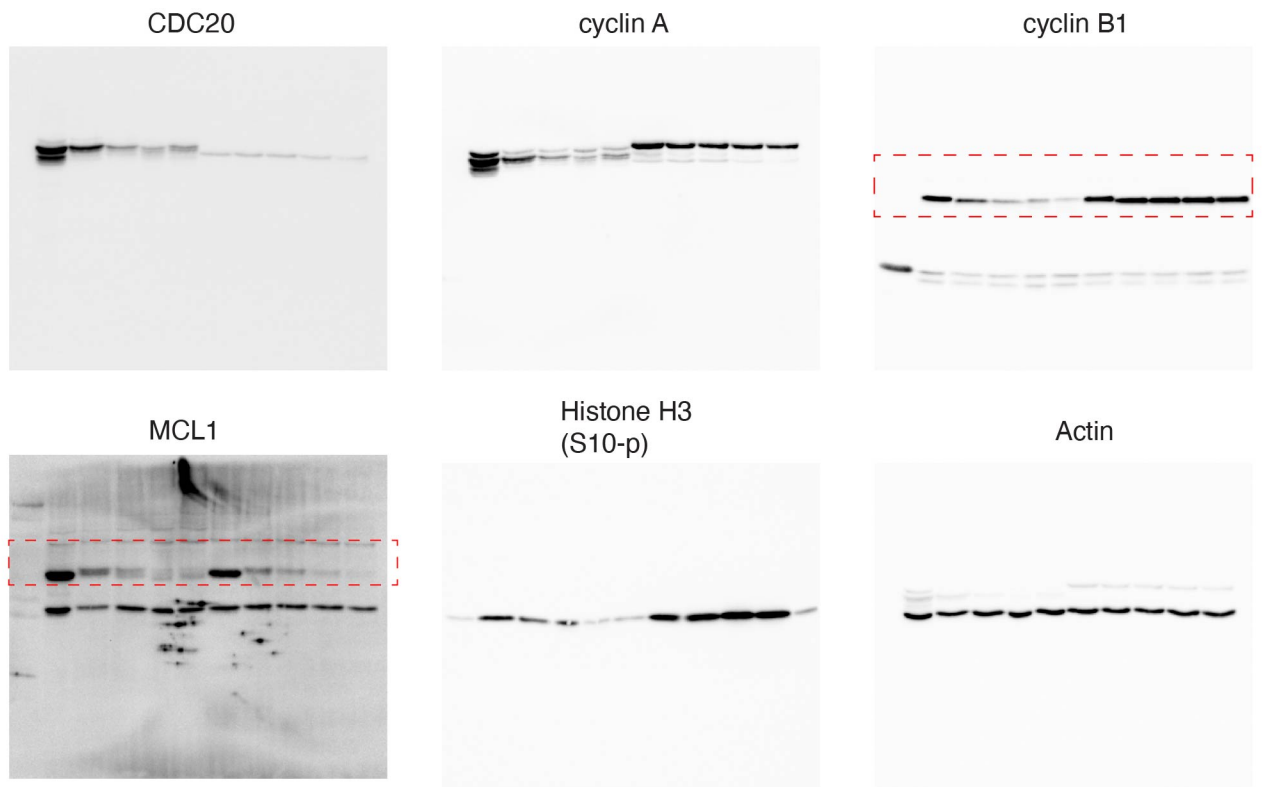

**Fig S1B**

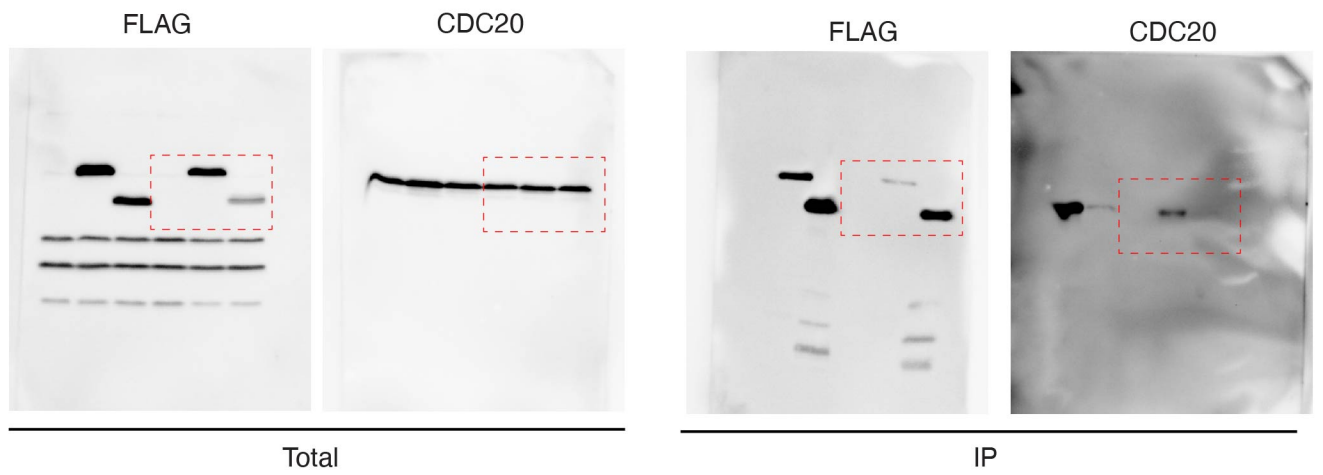

**Fig S1C**

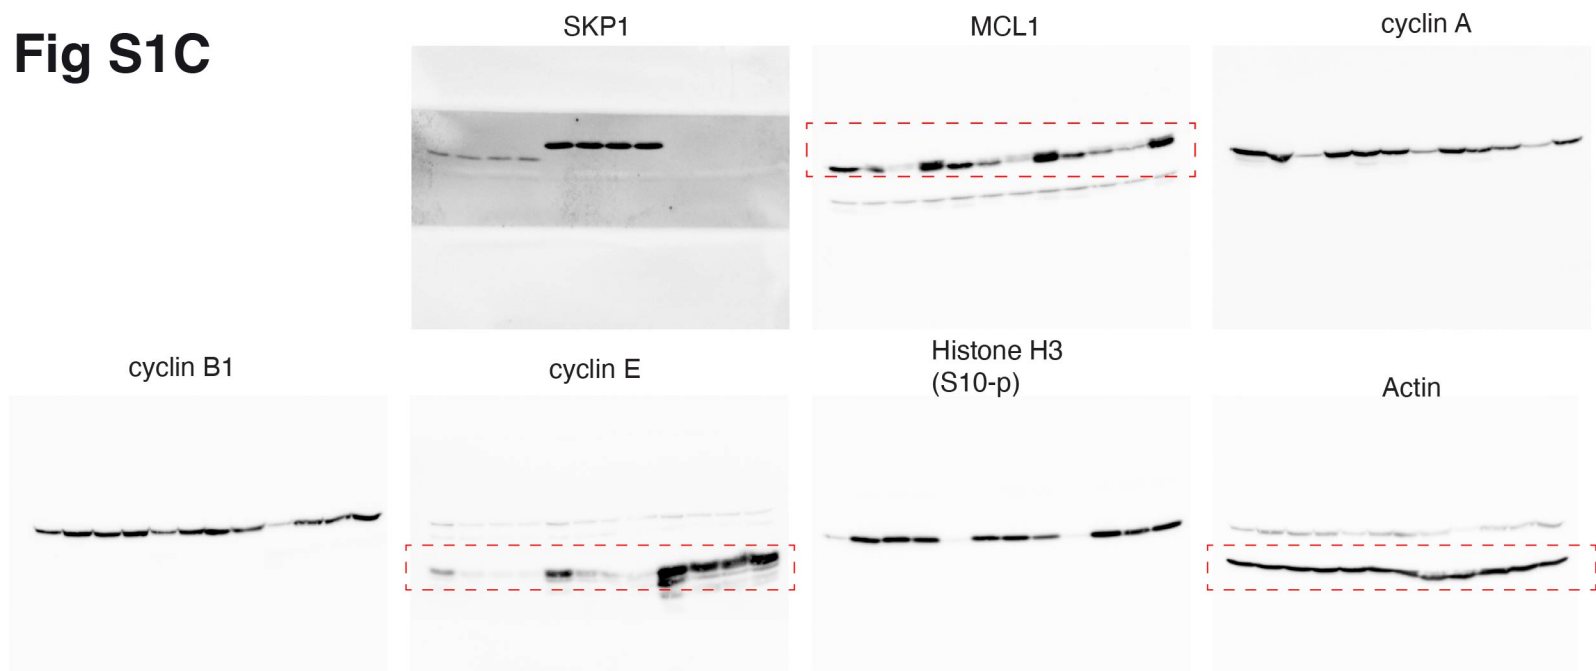

**Fig S3**

MCL1

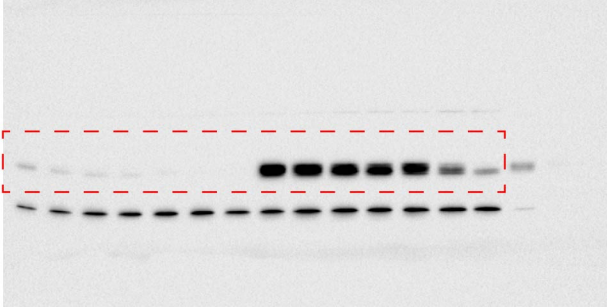

MCL1  
(long exposure)

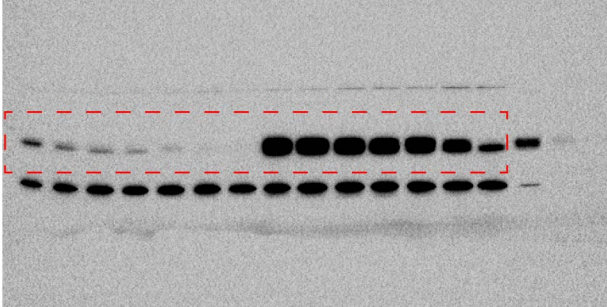

Histone H3  
(S10-p)

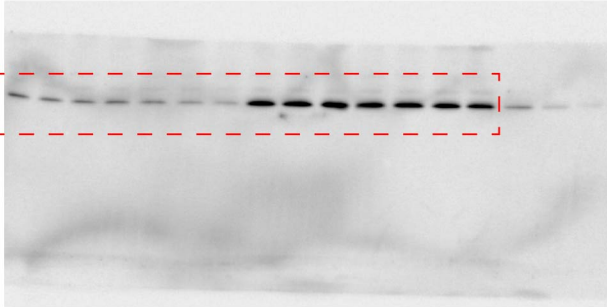

Actin

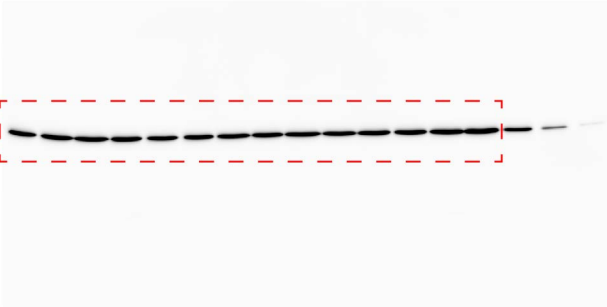

**Fig S4A**

MCL1

BCL-XL

Actin

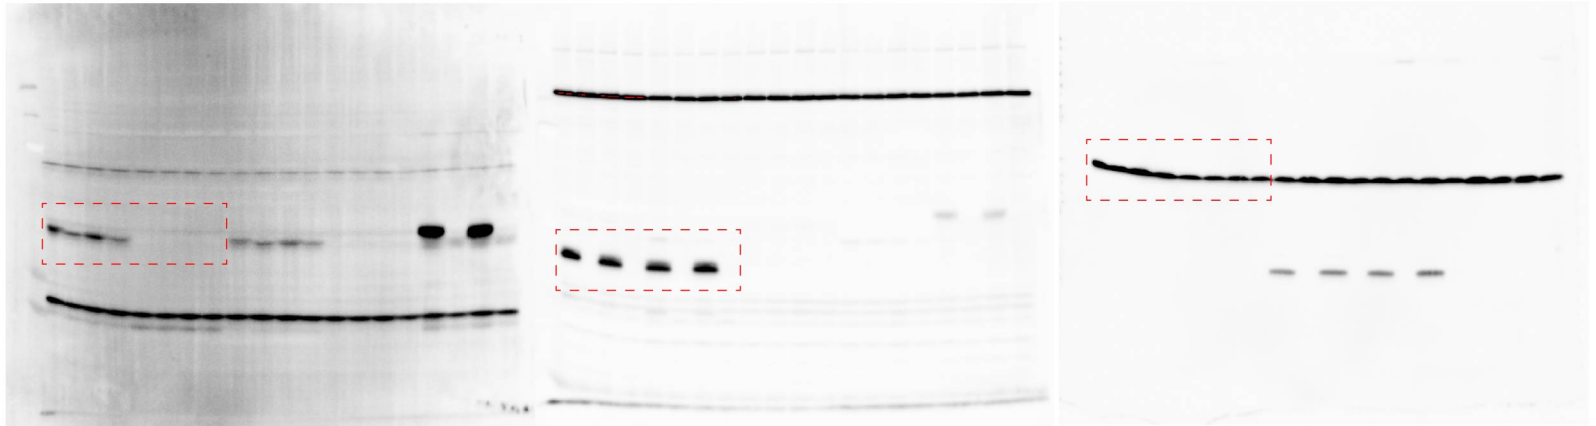

**Fig S4B**

MCL1

PARP1  
(cleaved)

cyclin A

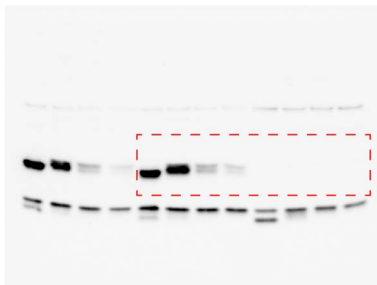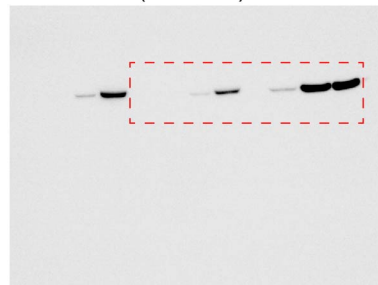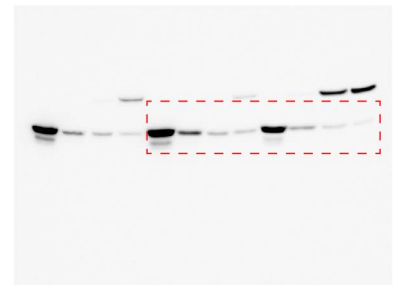

cyclin B1

Histone H3  
(S10-p)

Actin

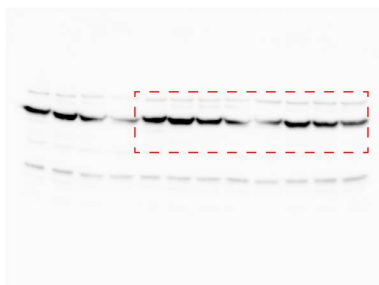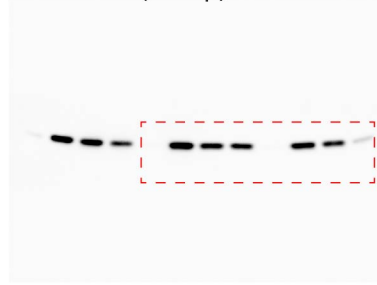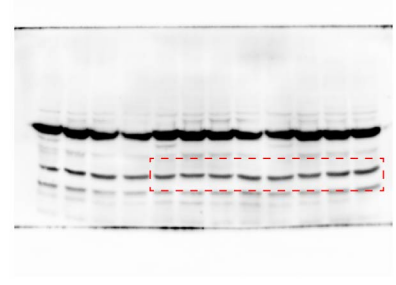

**Fig S5**

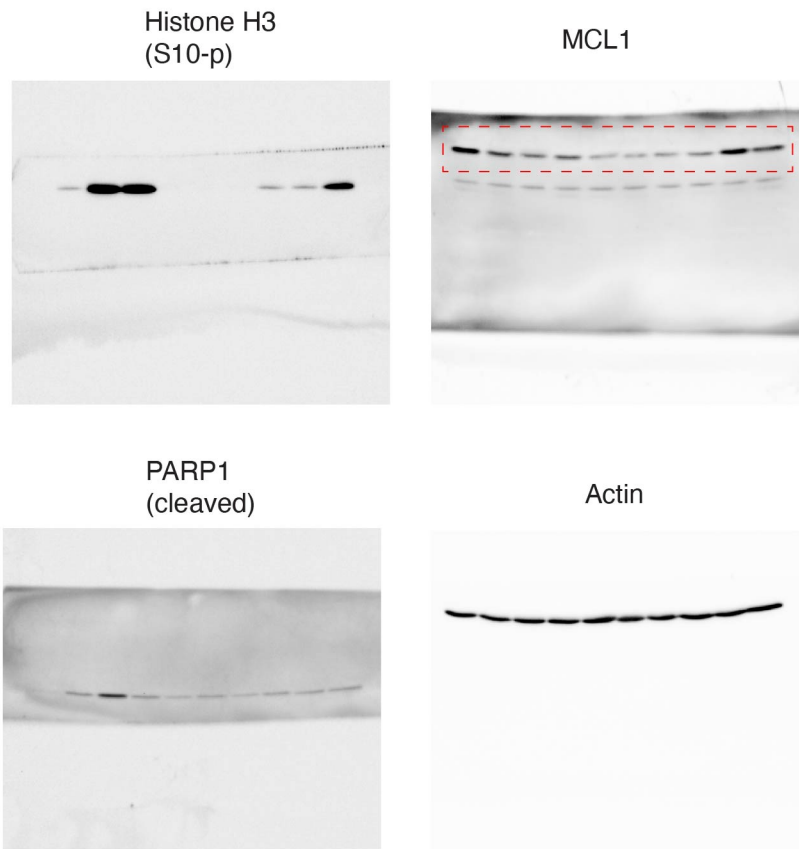

**Fig S7**

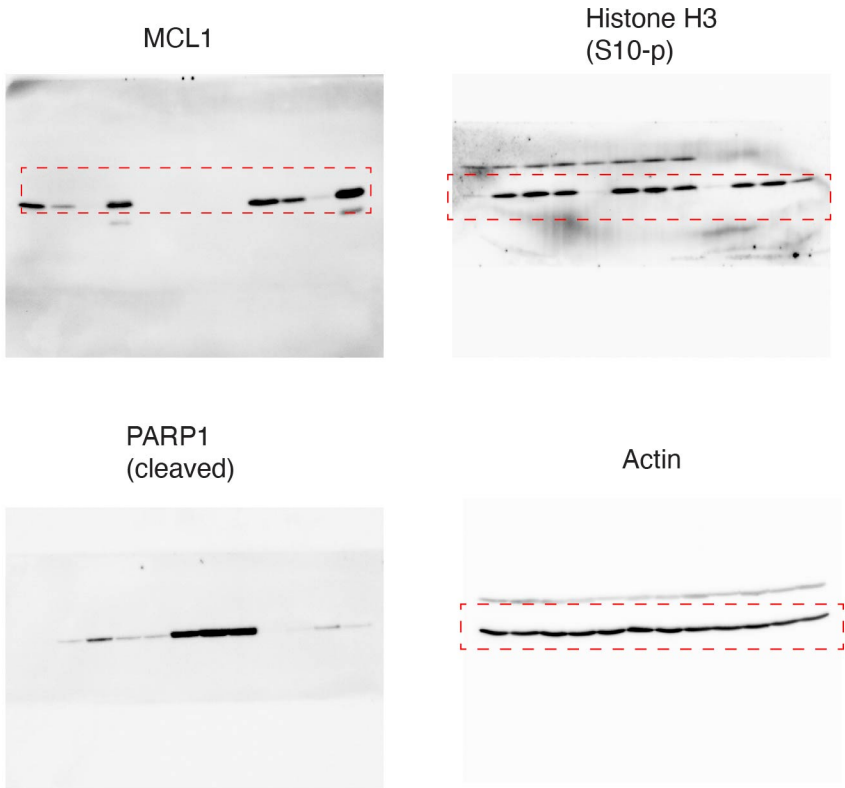

**Fig S9A**

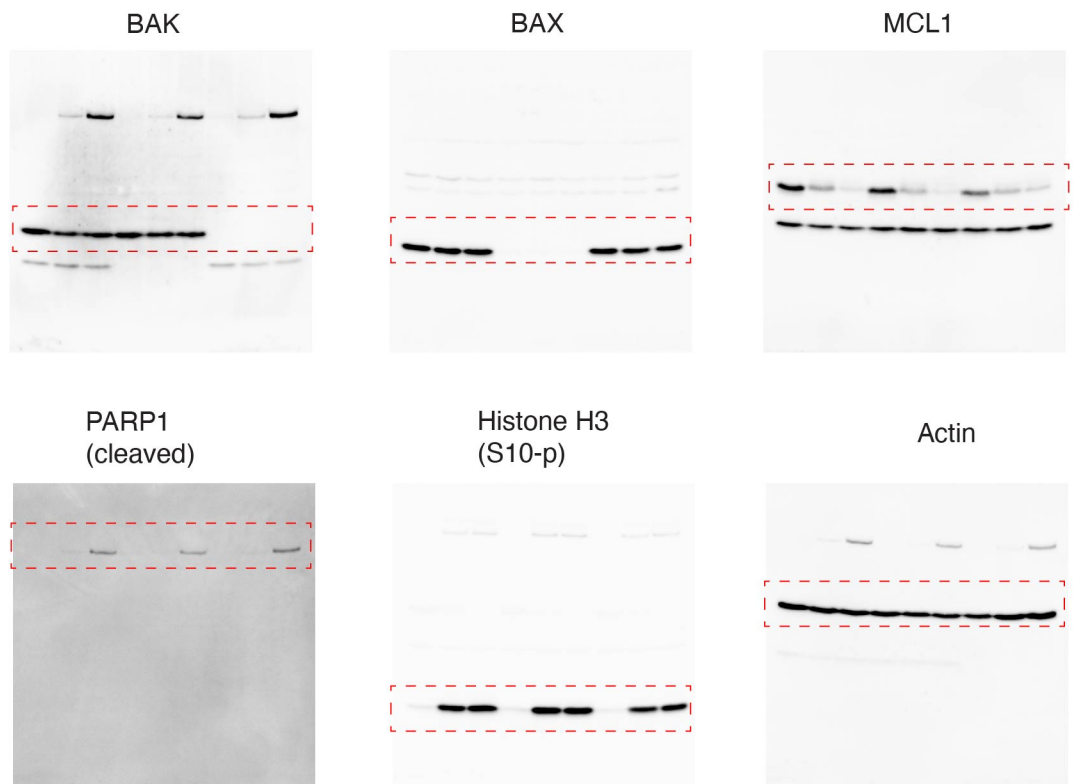

**Fig S9C**

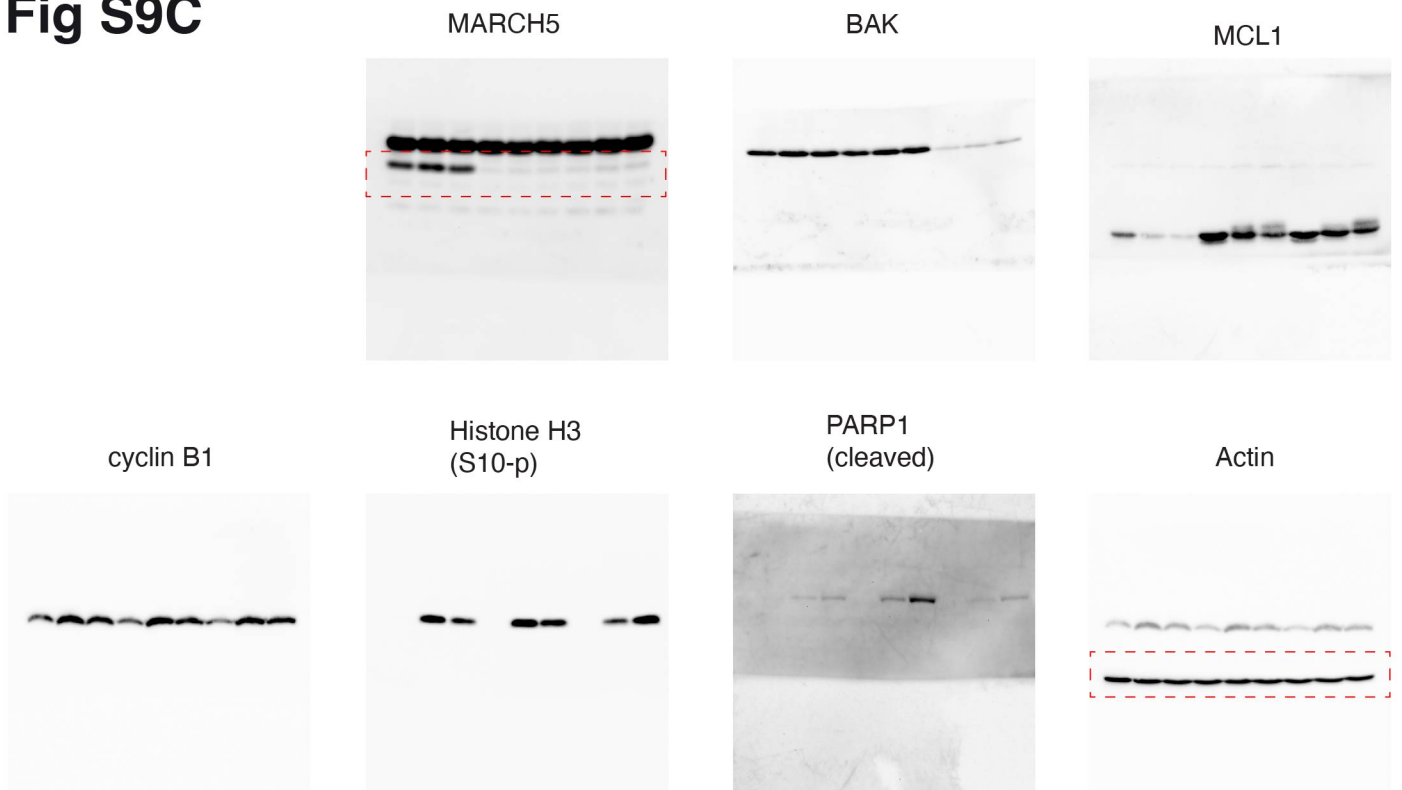



**Fig S8**

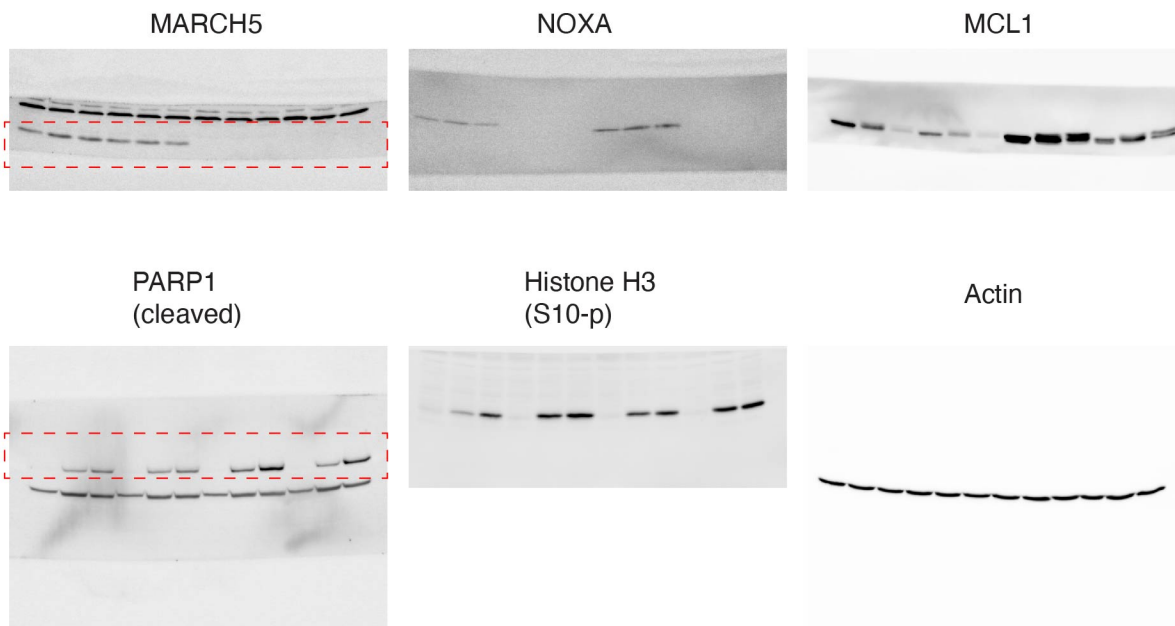

**Fig S10**

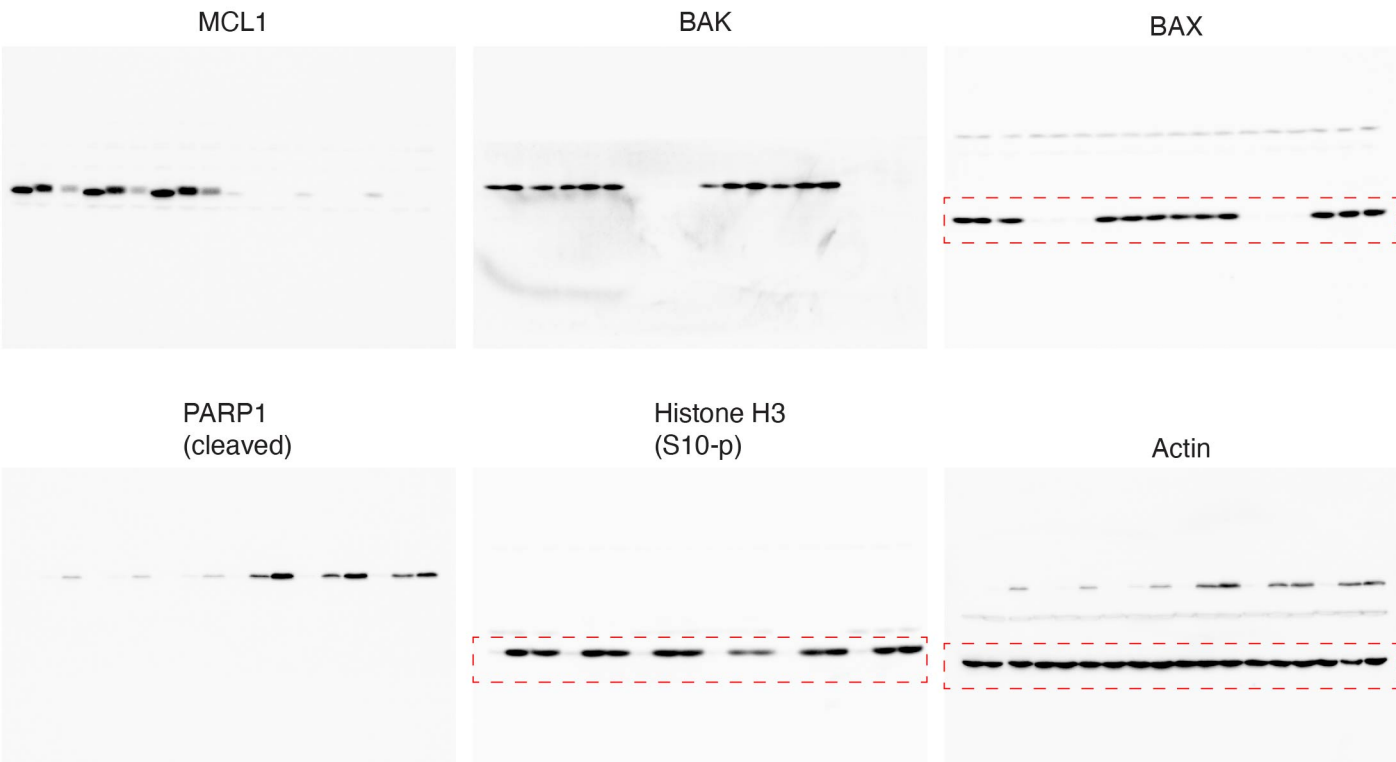

Supplement: 41418_2022_1080_MOESM13_ESM.pdf [file 41418_2022_1080_MOESM13_ESM.pdf]
