# Supplementary material for: MARCH5 regulates mitotic apoptosis through MCL1-dependent and independent mechanisms
Source: PubMed Central journal article supplement (PMC9984497; doi:10.1038/s41418-022-01080-2), 2022-11-03

**A**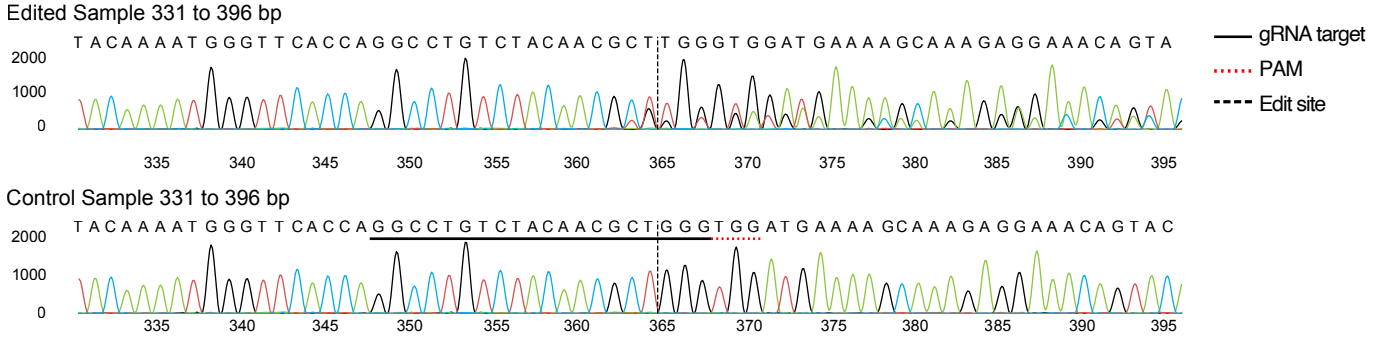**B**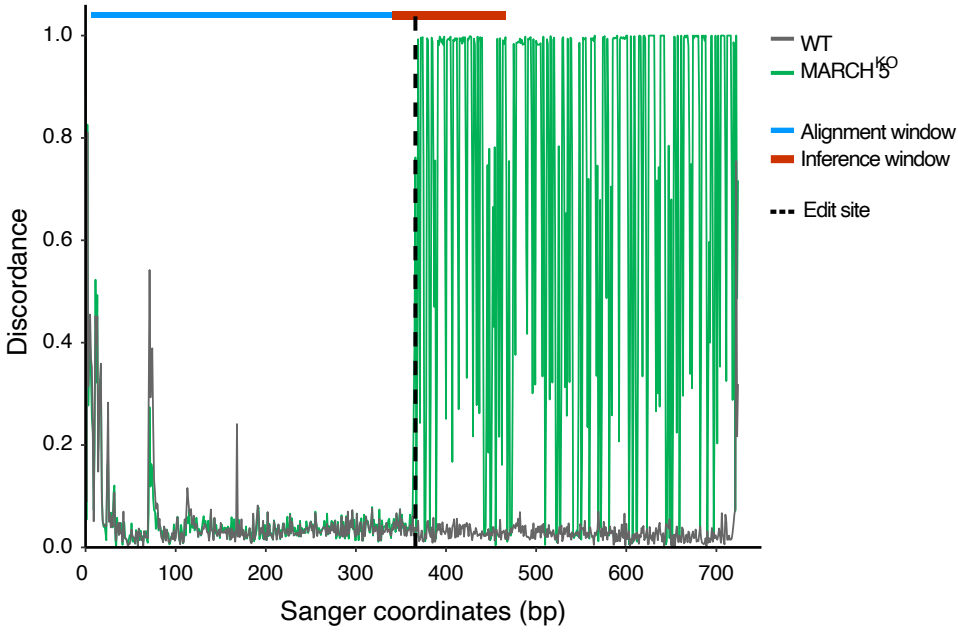**C**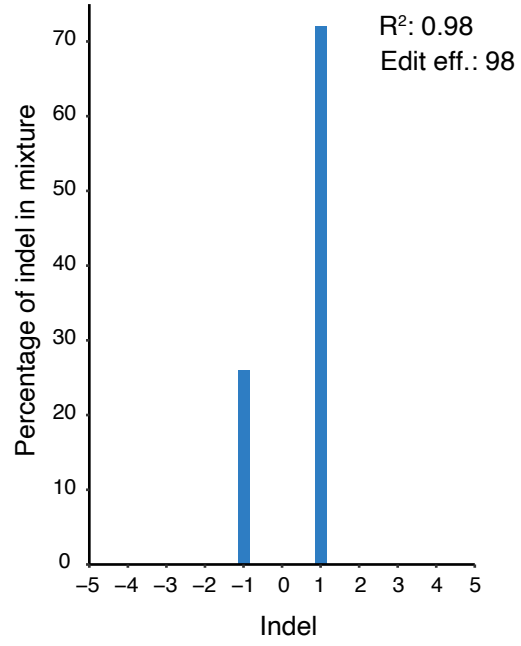

Supplement: 41418_2022_1080_MOESM3_ESM.pdf [file 41418_2022_1080_MOESM3_ESM.pdf]
